# Supplementary material
Source: MDPI journal article supplement (https://www.mdpi.com/2075-4701/11/10/1593)
Supplement: s1 [file s1 › metals-1379112-supplementary.pdf]

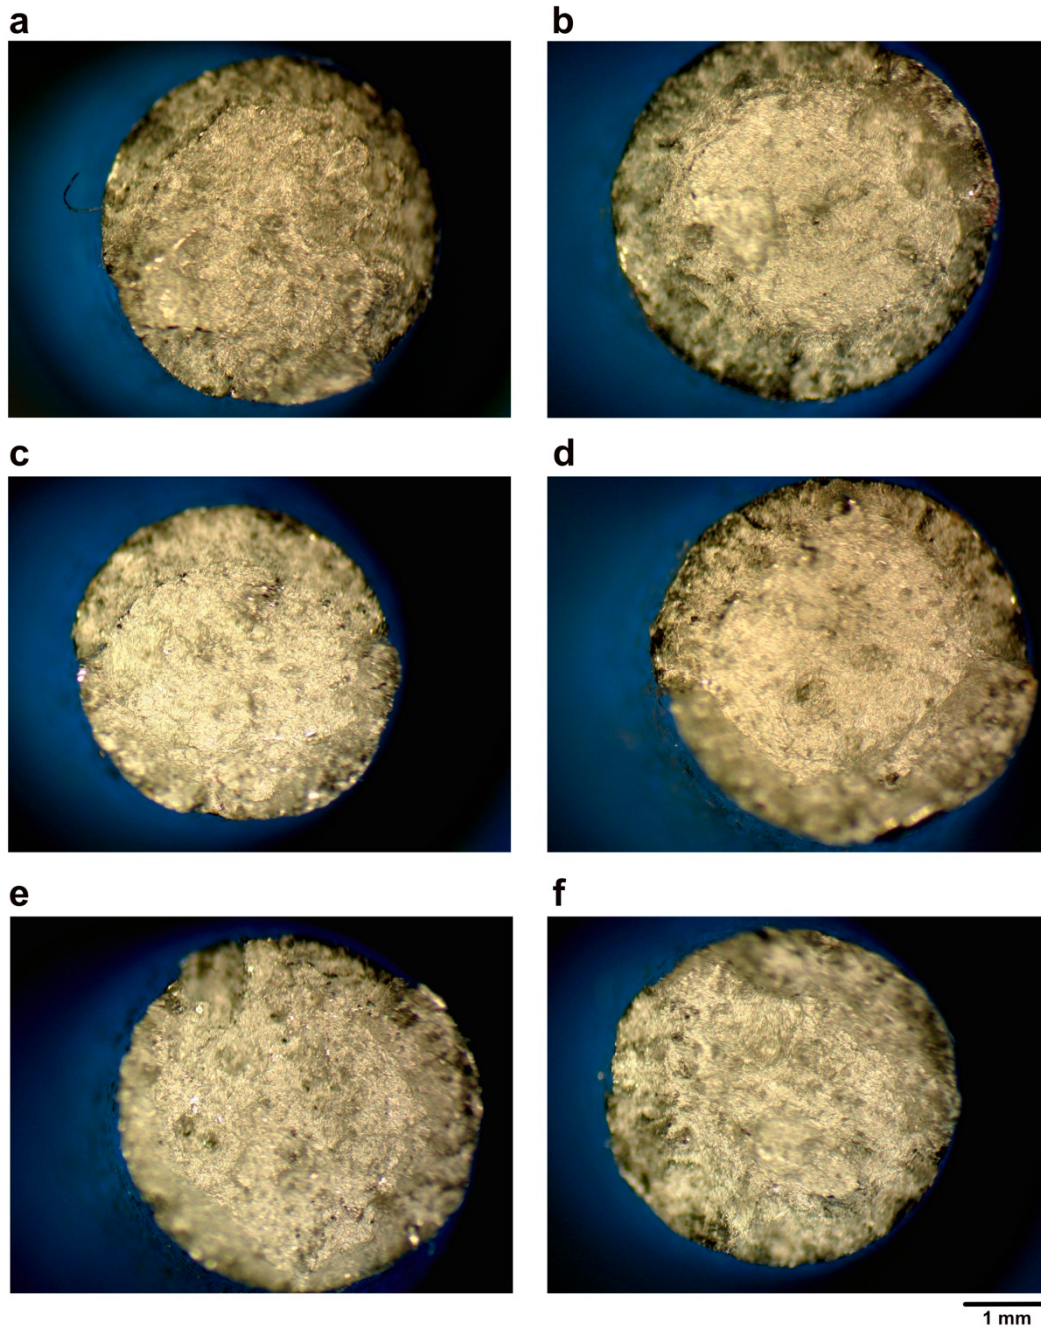

Figure. S1 Fracture surface characterization of tensile failed samples by using OM images: (a) 750-AC sample in the horizontal direction; (b) 750-AC sample in the vertical direction; (c) 850-AC sample in the horizontal direction; (d) 850-AC sample in the vertical direction; (e) 950-AC sample in the horizontal direction; (f) 950-AC sample in the vertical direction.
